# Supplementary material for: Differential nest-defense to perceived danger in urban and rural areas by female Eurasian sparrowhawk (Accipiter nisus)
Source: PeerJ. 2016 Jul 7;4:e2070. doi: 10.7717/peerj.2070 (PMC4941787; doi:10.7717/peerj.2070)
Supplement: Data S1 [file peerj-04-2070-s001.xlsx]

## Sheet: raw data
	Original data															Response 1												Response 2												Response 3
					log		log			log
Locality name	response category	locality (1 rural, 2 urban)	habitat density	nest height (m)	nest height	path distance (m)	path distance	breeding stage (1 eggs, 2 chicks)	fleeing distance	fleeing distance	individuality	road distance			locality name	response category	locality	habitat density	nest height	path distance	breeding stage	fleeing distance	individuality	road distance			locality name	response category	locality	habitat density	nest height	path distance	breeding stage	fleeing distance	individuality	road distance			locality name	response category	locality	habitat density	nest height	path distance	breeding stage	fleeing distance	individuality	road distance
Lesní hřbitov	1	1	1	7	1.94591	60	4.09434	1	50	3.93183	1	100			Lesní hřbitov	1	1	1	1.94591	4.09434	1	3.93183	1	100			Lesní hřbitov	0	1	1	1.94591	4.09434	1	3.93183	1	100			Lesní hřbitov	0	1	1	1.94591	4.09434	1	3.93183	1	100
Lindava	1	1	2	14	2.63906	50	3.91202	1	30	3.43399	3	80			Lindava	1	1	2	2.63906	3.91202	1	3.43399	3	80			Lindava	0	1	2	2.63906	3.91202	1	3.43399	3	80			Lindava	0	1	2	2.63906	3.91202	1	3.43399	3	80
Heřmanice	1	1	1	12	2.48491	15	2.70805	1	15	2.77259	4	340			Heřmanice	1	1	1	2.48491	2.70805	1	2.77259	4	340			Heřmanice	0	1	1	2.48491	2.70805	1	2.77259	4	340			Heřmanice	0	1	1	2.48491	2.70805	1	2.77259	4	340
Cvikov trávník	1	1	1	8	2.07944	10	2.30259	1	21	3.09104	5	170			Cvikov trávník	1	1	1	2.07944	2.30259	1	3.09104	5	170			Cvikov trávník	0	1	1	2.07944	2.30259	1	3.09104	5	170			Cvikov trávník	0	1	1	2.07944	2.30259	1	3.09104	5	170
Obora	1	1	1	7	1.94591	200	5.29832	1	50	3.93183	13	180			Obora	1	1	1	1.94591	5.29832	1	3.93183	13	180			Obora	0	1	1	1.94591	5.29832	1	3.93183	13	180			Obora	0	1	1	1.94591	5.29832	1	3.93183	13	180
Kováry	1	1	1	6	1.79176	100	4.60517	1	0	0	14	120			Kováry	1	1	1	1.79176	4.60517	1	0	14	120			Kováry	0	1	1	1.79176	4.60517	1	0	14	120			Kováry	0	1	1	1.79176	4.60517	1	0	14	120
Úholičky	1	1	2	11	2.3979	50	3.91202	1	45	3.82864	15	280			Úholičky	1	1	2	2.3979	3.91202	1	3.82864	15	280			Úholičky	0	1	2	2.3979	3.91202	1	3.82864	15	280			Úholičky	0	1	2	2.3979	3.91202	1	3.82864	15	280
Zlatnice	1	2	2	12	2.48491	15	2.70805	1	20	3.04452	18	170			Zlatnice	1	2	2	2.48491	2.70805	1	3.04452	18	170			Zlatnice	0	2	2	2.48491	2.70805	1	3.04452	18	170			Zlatnice	0	2	2	2.48491	2.70805	1	3.04452	18	170
Ladronka	1	2	1	7	1.94591	100	4.60517	1	0	0	20	55			Ladronka	1	2	1	1.94591	4.60517	1	0	20	55			Ladronka	0	2	1	1.94591	4.60517	1	0	20	55			Ladronka	0	2	1	1.94591	4.60517	1	0	20	55
Jinonická	1	2	2	8	2.07944	40	3.68888	1	30	3.43399	21	205			Jinonická	1	2	2	2.07944	3.68888	1	3.43399	21	205			Jinonická	0	2	2	2.07944	3.68888	1	3.43399	21	205			Jinonická	0	2	2	2.07944	3.68888	1	3.43399	21	205
Zličín	1	2	2	8	2.07944	55	4.00733	1	40	3.71357	27	65			Zličín	1	2	2	2.07944	4.00733	1	3.71357	27	65			Zličín	0	2	2	2.07944	4.00733	1	3.71357	27	65			Zličín	0	2	2	2.07944	4.00733	1	3.71357	27	65
Ďáblice střed	1	2	2	12	2.48491	35	3.55535	1	0	0	28	130			Ďáblice střed	1	2	2	2.48491	3.55535	1	0	28	130			Ďáblice střed	0	2	2	2.48491	3.55535	1	0	28	130			Ďáblice střed	0	2	2	2.48491	3.55535	1	0	28	130
Vepřek	1	1	2	7	1.94591	30	3.4012	1	4	1.60944	36	30			Vepřek	1	1	2	1.94591	3.4012	1	1.60944	36	30			Vepřek	0	1	2	1.94591	3.4012	1	1.60944	36	30			Vepřek	0	1	2	1.94591	3.4012	1	1.60944	36	30
Lesní hřbitov	1	1	1	7	1.94591	60	4.09434	2	50	3.93183	1	100			Lesní hřbitov	1	1	1	1.94591	4.09434	2	3.93183	1	100			Lesní hřbitov	0	1	1	1.94591	4.09434	2	3.93183	1	100			Lesní hřbitov	0	1	1	1.94591	4.09434	2	3.93183	1	100
Heřmanice	1	1	1	12	2.48491	15	2.70805	2	20	3.04452	4	340			Heřmanice	1	1	1	2.48491	2.70805	2	3.04452	4	340			Heřmanice	0	1	1	2.48491	2.70805	2	3.04452	4	340			Heřmanice	0	1	1	2.48491	2.70805	2	3.04452	4	340
Obora	1	1	1	7	1.94591	200	5.29832	2	40	3.71357	13	180			Obora	1	1	1	1.94591	5.29832	2	3.71357	13	180			Obora	0	1	1	1.94591	5.29832	2	3.71357	13	180			Obora	0	1	1	1.94591	5.29832	2	3.71357	13	180
Zlatnice	1	2	2	12	2.48491	15	2.70805	2	18	2.94444	18	170			Zlatnice	1	2	2	2.48491	2.70805	2	2.94444	18	170			Zlatnice	0	2	2	2.48491	2.70805	2	2.94444	18	170			Zlatnice	0	2	2	2.48491	2.70805	2	2.94444	18	170
Jinonická	1	2	2	8	2.07944	40	3.68888	2	30	3.43399	21	205			Jinonická	1	2	2	2.07944	3.68888	2	3.43399	21	205			Jinonická	0	2	2	2.07944	3.68888	2	3.43399	21	205			Jinonická	0	2	2	2.07944	3.68888	2	3.43399	21	205
Zličín	1	2	2	8	2.07944	55	4.00733	2	35	3.58352	27	65			Zličín	1	2	2	2.07944	4.00733	2	3.58352	27	65			Zličín	0	2	2	2.07944	4.00733	2	3.58352	27	65			Zličín	0	2	2	2.07944	4.00733	2	3.58352	27	65
Klíčov	1	2	1	5	1.60944	45	3.80666	2	26	3.29584	34	100			Klíčov	1	2	1	1.60944	3.80666	2	3.29584	34	100			Klíčov	0	2	1	1.60944	3.80666	2	3.29584	34	100			Klíčov	0	2	1	1.60944	3.80666	2	3.29584	34	100
Manušice	2	1	2	12	2.48491	200	5.29832	1	80	4.39445	8	895			Manušice	0	1	2	2.48491	5.29832	1	4.39445	8	895			Manušice	1	1	2	2.48491	5.29832	1	4.39445	8	895			Manušice	0	1	2	2.48491	5.29832	1	4.39445	8	895
Lípa žízníkov	2	1	2	12	2.48491	80	4.38203	1	30	3.43399	9	140			Lípa žízníkov	0	1	2	2.48491	4.38203	1	3.43399	9	140			Lípa žízníkov	1	1	2	2.48491	4.38203	1	3.43399	9	140			Lípa žízníkov	0	1	2	2.48491	4.38203	1	3.43399	9	140
Lhotka	2	1	1	8	2.07944	15	2.70805	1	14	2.70805	12	170			Lhotka	0	1	1	2.07944	2.70805	1	2.70805	12	170			Lhotka	1	1	1	2.07944	2.70805	1	2.70805	12	170			Lhotka	0	1	1	2.07944	2.70805	1	2.70805	12	170
Lindava	2	1	2	14	2.63906	50	3.91202	2	20	3.04452	3	80			Lindava	0	1	2	2.63906	3.91202	2	3.04452	3	80			Lindava	1	1	2	2.63906	3.91202	2	3.04452	3	80			Lindava	0	1	2	2.63906	3.91202	2	3.04452	3	80
Manušice	2	1	2	12	2.48491	200	5.29832	2	40	3.71357	8	895			Manušice	0	1	2	2.48491	5.29832	2	3.71357	8	895			Manušice	1	1	2	2.48491	5.29832	2	3.71357	8	895			Manušice	0	1	2	2.48491	5.29832	2	3.71357	8	895
Lípa žízníkov	2	1	2	12	2.48491	80	4.38203	2	25	3.2581	9	140			Lípa žízníkov	0	1	2	2.48491	4.38203	2	3.2581	9	140			Lípa žízníkov	1	1	2	2.48491	4.38203	2	3.2581	9	140			Lípa žízníkov	0	1	2	2.48491	4.38203	2	3.2581	9	140
Lhotka	2	1	1	8	2.07944	15	2.70805	2	2	1.09861	12	170			Lhotka	0	1	1	2.07944	2.70805	2	1.09861	12	170			Lhotka	1	1	1	2.07944	2.70805	2	1.09861	12	170			Lhotka	0	1	1	2.07944	2.70805	2	1.09861	12	170
Kováry	2	1	1	6	1.79176	100	4.60517	2	8	2.19722	14	120			Kováry	0	1	1	1.79176	4.60517	2	2.19722	14	120			Kováry	1	1	1	1.79176	4.60517	2	2.19722	14	120			Kováry	0	1	1	1.79176	4.60517	2	2.19722	14	120
Vepřek	2	1	2	7	1.94591	30	3.4012	2	14	2.70805	36	30			Vepřek	0	1	2	1.94591	3.4012	2	2.70805	36	30			Vepřek	1	1	2	1.94591	3.4012	2	2.70805	36	30			Vepřek	0	1	2	1.94591	3.4012	2	2.70805	36	30
Sloup rekreačka	3	1	2	13	2.56495	75	4.31749	1	0	0	2	340			Sloup rekreačka	0	1	2	2.56495	4.31749	1	0	2	340			Sloup rekreačka	0	1	2	2.56495	4.31749	1	0	2	340			Sloup rekreačka	1	1	2	2.56495	4.31749	1	0	2	340
Pihel	3	1	2	15	2.70805	15	2.70805	1	0	0	7	305			Pihel	0	1	2	2.70805	2.70805	1	0	7	305			Pihel	0	1	2	2.70805	2.70805	1	0	7	305			Pihel	1	1	2	2.70805	2.70805	1	0	7	305
Kunratice valcha	3	1	3	14	2.63906	20	2.99573	1	0	0	10	220			Kunratice valcha	0	1	3	2.63906	2.99573	1	0	10	220			Kunratice valcha	0	1	3	2.63906	2.99573	1	0	10	220			Kunratice valcha	1	1	3	2.63906	2.99573	1	0	10	220
Chloumek vysílač	3	1	2	10	2.30259	40	3.68888	1	0	0	11	887			Chloumek vysílač	0	1	2	2.30259	3.68888	1	0	11	887			Chloumek vysílač	0	1	2	2.30259	3.68888	1	0	11	887			Chloumek vysílač	1	1	2	2.30259	3.68888	1	0	11	887
Kamýcká	3	2	3	12	2.48491	30	3.4012	1	0	0	16	95			Kamýcká	0	2	3	2.48491	3.4012	1	0	16	95			Kamýcká	0	2	3	2.48491	3.4012	1	0	16	95			Kamýcká	1	2	3	2.48491	3.4012	1	0	16	95
Motol střed	3	2	2	12	2.48491	40	3.68888	1	20	3.04452	24	105			Motol střed	0	2	2	2.48491	3.68888	1	3.04452	24	105			Motol střed	0	2	2	2.48491	3.68888	1	3.04452	24	105			Motol střed	1	2	2	2.48491	3.68888	1	3.04452	24	105
Čimičák	3	2	2	14	2.63906	50	3.91202	1	0	0	29	310			Čimičák	0	2	2	2.63906	3.91202	1	0	29	310			Čimičák	0	2	2	2.63906	3.91202	1	0	29	310			Čimičák	1	2	2	2.63906	3.91202	1	0	29	310
Klíčov	3	2	1	5	1.60944	45	3.80666	1	15	2.77259	34	100			Klíčov	0	2	1	1.60944	3.80666	1	2.77259	34	100			Klíčov	0	2	1	1.60944	3.80666	1	2.77259	34	100			Klíčov	1	2	1	1.60944	3.80666	1	2.77259	34	100
Vel Buk Karlovka	3	1	1	7	1.94591	25	3.21888	1	0	0	35	25			Vel Buk Karlovka	0	1	1	1.94591	3.21888	1	0	35	25			Vel Buk Karlovka	0	1	1	1.94591	3.21888	1	0	35	25			Vel Buk Karlovka	1	1	1	1.94591	3.21888	1	0	35	25
Cvikov trávník	3	1	1	8	2.07944	10	2.30259	2	0	0	5	170			Cvikov trávník	0	1	1	2.07944	2.30259	2	0	5	170			Cvikov trávník	0	1	1	2.07944	2.30259	2	0	5	170			Cvikov trávník	1	1	1	2.07944	2.30259	2	0	5	170
Kunratice valcha	3	1	3	14	2.63906	20	2.99573	2	0	0	10	220			Kunratice valcha	0	1	3	2.63906	2.99573	2	0	10	220			Kunratice valcha	0	1	3	2.63906	2.99573	2	0	10	220			Kunratice valcha	1	1	3	2.63906	2.99573	2	0	10	220
Chloumek vysílač	3	1	2	10	2.30259	40	3.68888	2	0	0	11	887			Chloumek vysílač	0	1	2	2.30259	3.68888	2	0	11	887			Chloumek vysílač	0	1	2	2.30259	3.68888	2	0	11	887			Chloumek vysílač	1	1	2	2.30259	3.68888	2	0	11	887
Úholičky	3	1	2	11	2.3979	50	3.91202	2	0	0	15	280			Úholičky	0	1	2	2.3979	3.91202	2	0	15	280			Úholičky	0	1	2	2.3979	3.91202	2	0	15	280			Úholičky	1	1	2	2.3979	3.91202	2	0	15	280
Ladronka	3	2	1	7	1.94591	100	4.60517	2	0	0	20	55			Ladronka	0	2	1	1.94591	4.60517	2	0	20	55			Ladronka	0	2	1	1.94591	4.60517	2	0	20	55			Ladronka	1	2	1	1.94591	4.60517	2	0	20	55
Ďáblice střed	3	2	2	12	2.48491	35	3.55535	2	2	1.09861	28	130			Ďáblice střed	0	2	2	2.48491	3.55535	2	1.09861	28	130			Ďáblice střed	0	2	2	2.48491	3.55535	2	1.09861	28	130			Ďáblice střed	1	2	2	2.48491	3.55535	2	1.09861	28	130
Čimičák	3	2	2	14	2.63906	50	3.91202	2	0	0	29	310			Čimičák	0	2	2	2.63906	3.91202	2	0	29	310			Čimičák	0	2	2	2.63906	3.91202	2	0	29	310			Čimičák	1	2	2	2.63906	3.91202	2	0	29	310
Vel Buk Karlovka	3	1	1	7	1.94591	25	3.21888	2	0	0	35	25			Vel Buk Karlovka	0	1	1	1.94591	3.21888	2	0	35	25			Vel Buk Karlovka	0	1	1	1.94591	3.21888	2	0	35	25			Vel Buk Karlovka	1	1	1	1.94591	3.21888	2	0	35	25
Jelení skok	4	1	2	13	2.56495	120	4.78749	1	0	0	6	300			Jelení skok	0	1	2	2.56495	4.78749	1	0	6	300			Jelení skok	0	1	2	2.56495	4.78749	1	0	6	300			Jelení skok	0	1	2	2.56495	4.78749	1	0	6	300
Paťanka	4	2	2	10	2.30259	60	4.09434	1	0	0	17	65			Paťanka	0	2	2	2.30259	4.09434	1	0	17	65			Paťanka	0	2	2	2.30259	4.09434	1	0	17	65			Paťanka	0	2	2	2.30259	4.09434	1	0	17	65
Evropská nad Džbánem	4	2	2	13	2.56495	18	2.89037	1	0	0	19	77			Evropská nad Džbánem	0	2	2	2.56495	2.89037	1	0	19	77			Evropská nad Džbánem	0	2	2	2.56495	2.89037	1	0	19	77			Evropská nad Džbánem	0	2	2	2.56495	2.89037	1	0	19	77
Cibulka	4	2	3	16	2.77259	6	1.79176	1	0	0	22	125			Cibulka	0	2	3	2.77259	1.79176	1	0	22	125			Cibulka	0	2	3	2.77259	1.79176	1	0	22	125			Cibulka	0	2	3	2.77259	1.79176	1	0	22	125
Roentgenova	4	2	1	7	1.94591	100	4.60517	1	0	0	23	150			Roentgenova	0	2	1	1.94591	4.60517	1	0	23	150			Roentgenova	0	2	1	1.94591	4.60517	1	0	23	150			Roentgenova	0	2	1	1.94591	4.60517	1	0	23	150
Krematorium proti	4	2	2	10	2.30259	2	0.693147	1	0	0	25	230			Krematorium proti	0	2	2	2.30259	0.693147	1	0	25	230			Krematorium proti	0	2	2	2.30259	0.693147	1	0	25	230			Krematorium proti	0	2	2	2.30259	0.693147	1	0	25	230
PP u hájů	4	2	4	15	2.70805	2	0.693147	1	0	0	26	220			PP u hájů	0	2	4	2.70805	0.693147	1	0	26	220			PP u hájů	0	2	4	2.70805	0.693147	1	0	26	220			PP u hájů	0	2	4	2.70805	0.693147	1	0	26	220
Bohnice botanická	4	2	3	16	2.77259	4	1.38629	1	0	0	30	200			Bohnice botanická	0	2	3	2.77259	1.38629	1	0	30	200			Bohnice botanická	0	2	3	2.77259	1.38629	1	0	30	200			Bohnice botanická	0	2	3	2.77259	1.38629	1	0	30	200
Prosek na stráži	4	2	2	11	2.3979	15	2.70805	1	0	0	31	20			Prosek na stráži	0	2	2	2.3979	2.70805	1	0	31	20			Prosek na stráži	0	2	2	2.3979	2.70805	1	0	31	20			Prosek na stráži	0	2	2	2.3979	2.70805	1	0	31	20
Prosek cvičák	4	2	2	9	2.19722	6	1.79176	1	0	0	32	70			Prosek cvičák	0	2	2	2.19722	1.79176	1	0	32	70			Prosek cvičák	0	2	2	2.19722	1.79176	1	0	32	70			Prosek cvičák	0	2	2	2.19722	1.79176	1	0	32	70
Prosek zatáčka	4	2	1	8	2.07944	15	2.70805	1	0	0	33	40			Prosek zatáčka	0	2	1	2.07944	2.70805	1	0	33	40			Prosek zatáčka	0	2	1	2.07944	2.70805	1	0	33	40			Prosek zatáčka	0	2	1	2.07944	2.70805	1	0	33	40
Sloup rekreačka	4	1	2	13	2.56495	75	4.31749	2	0	0	2	340			Sloup rekreačka	0	1	2	2.56495	4.31749	2	0	2	340			Sloup rekreačka	0	1	2	2.56495	4.31749	2	0	2	340			Sloup rekreačka	0	1	2	2.56495	4.31749	2	0	2	340
Jelení skok	4	1	2	13	2.56495	120	4.78749	2	0	0	6	300			Jelení skok	0	1	2	2.56495	4.78749	2	0	6	300			Jelení skok	0	1	2	2.56495	4.78749	2	0	6	300			Jelení skok	0	1	2	2.56495	4.78749	2	0	6	300
Pihel	4	1	2	15	2.70805	15	2.70805	2	0	0	7	305			Pihel	0	1	2	2.70805	2.70805	2	0	7	305			Pihel	0	1	2	2.70805	2.70805	2	0	7	305			Pihel	0	1	2	2.70805	2.70805	2	0	7	305
Kamýcká	4	2	3	12	2.48491	30	3.4012	2	0	0	16	95			Kamýcká	0	2	3	2.48491	3.4012	2	0	16	95			Kamýcká	0	2	3	2.48491	3.4012	2	0	16	95			Kamýcká	0	2	3	2.48491	3.4012	2	0	16	95
Paťanka	4	2	2	10	2.30259	60	4.09434	2	0	0	17	65			Paťanka	0	2	2	2.30259	4.09434	2	0	17	65			Paťanka	0	2	2	2.30259	4.09434	2	0	17	65			Paťanka	0	2	2	2.30259	4.09434	2	0	17	65
Evropská nad Džbánem	4	2	2	13	2.56495	18	2.89037	2	0	0	19	77			Evropská nad Džbánem	0	2	2	2.56495	2.89037	2	0	19	77			Evropská nad Džbánem	0	2	2	2.56495	2.89037	2	0	19	77			Evropská nad Džbánem	0	2	2	2.56495	2.89037	2	0	19	77
Cibulka	4	2	3	16	2.77259	6	1.79176	2	0	0	22	125			Cibulka	0	2	3	2.77259	1.79176	2	0	22	125			Cibulka	0	2	3	2.77259	1.79176	2	0	22	125			Cibulka	0	2	3	2.77259	1.79176	2	0	22	125
Roentgenova	4	2	1	7	1.94591	100	4.60517	2	0	0	23	150			Roentgenova	0	2	1	1.94591	4.60517	2	0	23	150			Roentgenova	0	2	1	1.94591	4.60517	2	0	23	150			Roentgenova	0	2	1	1.94591	4.60517	2	0	23	150
Motol střed	4	2	2	12	2.48491	40	3.68888	2	0	0	24	105			Motol střed	0	2	2	2.48491	3.68888	2	0	24	105			Motol střed	0	2	2	2.48491	3.68888	2	0	24	105			Motol střed	0	2	2	2.48491	3.68888	2	0	24	105
Krematorium proti	4	2	2	10	2.30259	2	0.693147	2	0	0	25	230			Krematorium proti	0	2	2	2.30259	0.693147	2	0	25	230			Krematorium proti	0	2	2	2.30259	0.693147	2	0	25	230			Krematorium proti	0	2	2	2.30259	0.693147	2	0	25	230
PP u hájů	4	2	4	15	2.70805	2	0.693147	2	0	0	26	220			PP u hájů	0	2	4	2.70805	0.693147	2	0	26	220			PP u hájů	0	2	4	2.70805	0.693147	2	0	26	220			PP u hájů	0	2	4	2.70805	0.693147	2	0	26	220
Bohnice botanická	4	2	3	16	2.77259	4	1.38629	2	0	0	30	200			Bohnice botanická	0	2	3	2.77259	1.38629	2	0	30	200			Bohnice botanická	0	2	3	2.77259	1.38629	2	0	30	200			Bohnice botanická	0	2	3	2.77259	1.38629	2	0	30	200
Prosek na stráži	4	2	2	11	2.3979	15	2.70805	2	0	0	31	20			Prosek na stráži	0	2	2	2.3979	2.70805	2	0	31	20			Prosek na stráži	0	2	2	2.3979	2.70805	2	0	31	20			Prosek na stráži	0	2	2	2.3979	2.70805	2	0	31	20
Prosek cvičák	4	2	2	9	2.19722	6	1.79176	2	0	0	32	70			Prosek cvičák	0	2	2	2.19722	1.79176	2	0	32	70			Prosek cvičák	0	2	2	2.19722	1.79176	2	0	32	70			Prosek cvičák	0	2	2	2.19722	1.79176	2	0	32	70
Prosek zatáčka	4	2	1	8	2.07944	15	2.70805	2	0	0	33	40			Prosek zatáčka	0	2	1	2.07944	2.70805	2	0	33	40			Prosek zatáčka	0	2	1	2.07944	2.70805	2	0	33	40			Prosek zatáčka	0	2	1	2.07944	2.70805	2	0	33	40
															krah0<-read.delim("clipboard")												krah0<-read.delim("clipboard")													krah0<-read.delim("clipboard")
															krah0$lok<-as.factor(krah0$lok)												krah0$lok<-as.factor(krah0$lok)													krah0$lok<-as.factor(krah0$lok)
															krah0$stad<-as.factor(krah0$stad)												krah0$stad<-as.factor(krah0$stad)													krah0$stad<-as.factor(krah0$stad)
															krah0$ind<-as.factor(krah0$ind)												krah0$ind<-as.factor(krah0$ind)													krah0$ind<-as.factor(krah0$ind)
															glm.krah10<-lmer(reak~hust+cest+lok+stad+lok:stad+(1|ind),data= krah0)												glm.krah10<-lmer(reak~hust+cest+lok+stad+lok:stad+(1|ind),data= krah0)													glm.krah10<-lmer(reak~hust+cest+lok+stad+lok:stad+(1|ind),data= krah0)
															summary(glm.krah10)												Linear mixed model fit by REML ['lmerMod']													summary(glm.krah10)
															Linear mixed model fit by REML ['lmerMod']												Formula: reak ~ hust + cest + lok + stad + lok:stad + (1 | ind)
															Formula: reak ~ hust + cest + lok + stad + lok:stad + (1 | ind)												Data: krah0													Linear mixed model fit by REML ['lmerMod']
															Data: krah0																									Formula: reak ~ hust + cest + lok + stad + lok:stad + (1 | ind)
																											REML criterion at convergence: 85.8													Data: krah0
															REML criterion at convergence: 85.8
																											Scaled residuals:													REML criterion at convergence: 94
															Scaled residuals:												Min 1Q Median 3Q Max
															Min 1Q Median 3Q Max												-1.6507 -0.5384 -0.1062 0.3236 1.7916													Scaled residuals:
															-1.6507 -0.5384 -0.1062 0.3236 1.7916																									Min 1Q Median 3Q Max
																											Random effects:													-1.1321 -0.4293 -0.3237 -0.1012 1.9123
															Random effects:												Groups Name Variance Std.Dev.
															Groups Name Variance Std.Dev.												ind (Intercept) 0.09166 0.3027													Random effects:
															ind (Intercept) 0.09166 0.3027												Residual 0.09525 0.3086													Groups Name Variance Std.Dev.
															Residual 0.09525 0.3086												Number of obs: 72, groups: ind, 36													ind (Intercept) 0.0620 0.2490
															Number of obs: 72, groups: ind, 36																									Residual 0.1316 0.3627
																											Fixed effects:													Number of obs: 72, groups: ind, 36
															Fixed effects:												Estimate Std. Error t value
															Estimate Std. Error t value												(Intercept) 0.60773 0.35314 1.721													Fixed effects:
															(Intercept) 0.60773 0.35314 1.721												hust -0.17271 0.09846 -1.754													Estimate Std. Error t value
															hust -0.17271 0.09846 -1.754												cest 0.03892 0.06342 0.614													(Intercept) 1.081e-01 3.402e-01 0.318
															cest 0.03892 0.06342 0.614												lok2 -0.10631 0.15311 -0.694													hust 5.060e-02 9.431e-02 0.536
															lok2 -0.10631 0.15311 -0.694												stad2 -0.29412 0.10586 -2.779													cest 2.712e-02 6.075e-02 0.446
															stad2 -0.29412 0.10586 -2.779												lok2:stad2 0.24149 0.14571 1.657													lok2 -8.246e-02 1.548e-01 -0.533
															lok2:stad2 0.24149 0.14571 1.657																									stad2 -7.523e-17 1.244e-01 0.000
																											Correlation of Fixed Effects:													lok2:stad2 -5.263e-02 1.713e-01 -0.307
															Correlation of Fixed Effects:												(Intr) hust cest lok2 stad2
															(Intr) hust cest lok2 stad2												hust -0.719													Correlation of Fixed Effects:
															hust -0.719												cest -0.855 0.383													(Intr) hust cest lok2 stad2
															cest -0.855 0.383												lok2 -0.299 -0.134 0.231													hust -0.715
															lok2 -0.299 -0.134 0.231												stad2 -0.150 0.000 0.000 0.346													cest -0.851 0.383
															stad2 -0.150 0.000 0.000 0.346												lok2:stad2 0.109 0.000 0.000 -0.476 -0.726													lok2 -0.306 -0.127 0.219
															lok2:stad2 0.109 0.000 0.000 -0.476 -0.726																									stad2 -0.183 0.000 0.000 0.402
																																								lok2:stad2 0.133 0.000 0.000 -0.553 -0.726
															glm.krah11<-lmer(reak~hust+cest+lok+stad+(1|ind),data= krah0)
															> anova(glm.krah11,glm.krah10)												glm.krah10<-lmer(reak~hust+cest+lok+stad+lok:stad+(1|ind),data= krah0)													glm.krah10<-lmer(reak~hust+cest+lok+stad+lok:stad+(1|ind),data= krah0)
															refitting model(s) with ML (instead of REML)												glm.krah11<-lmer(reak~hust+cest+lok+stad+(1|ind),data= krah0)													> glm.krah11<-lmer(reak~hust+cest+lok+stad+(1|ind),data= krah0)
															Data: krah0																									> anova(glm.krah11,glm.krah10)
															Models:												> anova(glm.krah11,glm.krah10)													refitting model(s) with ML (instead of REML)
															glm.krah11: reak ~ hust + cest + lok + stad + (1 | ind)												refitting model(s) with ML (instead of REML)													Data: krah0
															glm.krah10: reak ~ hust + cest + lok + stad + lok:stad + (1 | ind)												Data: krah0													Models:
															Df AIC BIC logLik deviance Chisq Chi Df Pr(>Chisq)												Models:													glm.krah11: reak ~ hust + cest + lok + stad + (1 | ind)
															glm.krah11 7 84.167 100.10 -35.084 70.167												glm.krah11: reak ~ hust + cest + lok + stad + (1 | ind)													glm.krah10: reak ~ hust + cest + lok + stad + lok:stad + (1 | ind)
															glm.krah10 8 83.371 101.58 -33.685 67.371 2.7967 1 0.09446 .												glm.krah10: reak ~ hust + cest + lok + stad + lok:stad + (1 | ind)													Df AIC BIC logLik deviance Chisq Chi Df Pr(>Chisq)
															---												Df AIC BIC logLik deviance Chisq Chi Df Pr(>Chisq)													glm.krah11 7 90.003 105.94 -38.001 76.003
															Signif. codes: 0 ‘***’ 0.001 ‘**’ 0.01 ‘*’ 0.05 ‘.’ 0.1 ‘ ’ 1												glm.krah11 7 29.779 45.716 -7.8897 15.779													glm.krah10 8 91.903 110.12 -37.952 75.903 0.0999 1 0.752
															> glm.krah11<-lmer(reak~hust+cest+lok+stad+(1|ind),data= krah0)												glm.krah10 8 27.922 46.136 -5.9611 11.922 3.8572 1 0.04953 *													> glm.krah11<-lmer(reak~hust+cest+lok+stad+(1|ind),data= krah0)
															> glm.krah12<-lmer(reak~hust+cest+lok+(1|ind),data= krah0)																									> glm.krah12<-lmer(reak~hust+cest+lok+(1|ind),data= krah0)
															> anova(glm.krah12,glm.krah11)												glm.krah11<-lmer(reak~hust+cest+lok+stad+(1|ind),data= krah0)													> anova(glm.krah12,glm.krah11)
															refitting model(s) with ML (instead of REML)												> glm.krah12<-lmer(reak~hust+cest+lok+(1|ind),data= krah0)													refitting model(s) with ML (instead of REML)
															Data: krah0												> anova(glm.krah12,glm.krah11)													Data: krah0
															Models:												refitting model(s) with ML (instead of REML)													Models:
															glm.krah12: reak ~ hust + cest + lok + (1 | ind)												Data: krah0													glm.krah12: reak ~ hust + cest + lok + (1 | ind)
															glm.krah11: reak ~ hust + cest + lok + stad + (1 | ind)												Models:													glm.krah11: reak ~ hust + cest + lok + stad + (1 | ind)
															Df AIC BIC logLik deviance Chisq Chi Df Pr(>Chisq)												glm.krah12: reak ~ hust + cest + lok + (1 | ind)													Df AIC BIC logLik deviance Chisq Chi Df Pr(>Chisq)
															glm.krah12 6 86.975 100.64 -37.487 74.975												glm.krah11: reak ~ hust + cest + lok + stad + (1 | ind)													glm.krah12 6 88.114 101.77 -38.057 76.114
															glm.krah11 7 84.167 100.10 -35.084 70.167 4.8071 1 0.02834 *												Df AIC BIC logLik deviance Chisq Chi Df Pr(>Chisq)													glm.krah11 7 90.003 105.94 -38.001 76.003 0.1113 1 0.7387
															---												glm.krah12 6 30.912 44.572 -9.4559 18.912													> glm.krah12<-lmer(reak~hust+cest+stad+(1|ind),data= krah0)
															Signif. codes: 0 ‘***’ 0.001 ‘**’ 0.01 ‘*’ 0.05 ‘.’ 0.1 ‘ ’ 1												glm.krah11 7 29.779 45.716 -7.8897 15.779 3.1324 1 0.07675 .													> anova(glm.krah12,glm.krah11)
															> glm.krah12<-lmer(reak~hust+cest+stad+(1|ind),data= krah0)												---													refitting model(s) with ML (instead of REML)
															> anova(glm.krah12,glm.krah11)												Signif. codes: 0 ‘***’ 0.001 ‘**’ 0.01 ‘*’ 0.05 ‘.’ 0.1 ‘ ’ 1													Data: krah0
															refitting model(s) with ML (instead of REML)												> glm.krah12<-lmer(reak~hust+cest+stad+(1|ind),data= krah0)													Models:
															Data: krah0												> anova(glm.krah12,glm.krah11)													glm.krah12: reak ~ hust + cest + stad + (1 | ind)
															Models:												refitting model(s) with ML (instead of REML)													glm.krah11: reak ~ hust + cest + lok + stad + (1 | ind)
															glm.krah12: reak ~ hust + cest + stad + (1 | ind)												Data: krah0													Df AIC BIC logLik deviance Chisq Chi Df Pr(>Chisq)
															glm.krah11: reak ~ hust + cest + lok + stad + (1 | ind)												Models:													glm.krah12 6 88.794 102.45 -38.397 76.794
															Df AIC BIC logLik deviance Chisq Chi Df Pr(>Chisq)												glm.krah12: reak ~ hust + cest + stad + (1 | ind)													glm.krah11 7 90.003 105.94 -38.001 76.003 0.7912 1 0.3737
															glm.krah12 6 82.180 95.84 -35.090 70.180												glm.krah11: reak ~ hust + cest + lok + stad + (1 | ind)													> glm.krah12<-lmer(reak~hust+lok+stad+(1|ind),data= krah0)
															glm.krah11 7 84.167 100.10 -35.084 70.167 0.0129 1 0.9095												Df AIC BIC logLik deviance Chisq Chi Df Pr(>Chisq)													> anova(glm.krah12,glm.krah11)
															> glm.krah12<-lmer(reak~hust+lok+stad+(1|ind),data= krah0)												glm.krah12 6 33.853 47.513 -10.9265 21.853													refitting model(s) with ML (instead of REML)
															> anova(glm.krah12,glm.krah11)												glm.krah11 7 29.779 45.716 -7.8897 15.779 6.0736 1 0.01372 *													Data: krah0
															refitting model(s) with ML (instead of REML)												---													Models:
															Data: krah0												Signif. codes: 0 ‘***’ 0.001 ‘**’ 0.01 ‘*’ 0.05 ‘.’ 0.1 ‘ ’ 1													glm.krah12: reak ~ hust + lok + stad + (1 | ind)
															Models:												> glm.krah12<-lmer(reak~hust+lok+stad+(1|ind),data= krah0)													glm.krah11: reak ~ hust + cest + lok + stad + (1 | ind)
															glm.krah12: reak ~ hust + lok + stad + (1 | ind)												> anova(glm.krah12,glm.krah11)													Df AIC BIC logLik deviance Chisq Chi Df Pr(>Chisq)
															glm.krah11: reak ~ hust + cest + lok + stad + (1 | ind)												refitting model(s) with ML (instead of REML)													glm.krah12 6 88.227 101.89 -38.113 76.227
															Df AIC BIC logLik deviance Chisq Chi Df Pr(>Chisq)												Data: krah0													glm.krah11 7 90.003 105.94 -38.001 76.003 0.2236 1 0.6363
															glm.krah12 6 82.589 96.249 -35.294 70.589												Models:													> glm.krah12<-lmer(reak~cest+lok+stad+(1|ind),data= krah0)
															glm.krah11 7 84.167 100.104 -35.084 70.167 0.4212 1 0.5163												glm.krah12: reak ~ hust + lok + stad + (1 | ind)													> anova(glm.krah12,glm.krah11)
															> glm.krah12<-lmer(reak~cest+lok+stad+(1|ind),data= krah0)												glm.krah11: reak ~ hust + cest + lok + stad + (1 | ind)													refitting model(s) with ML (instead of REML)
															> anova(glm.krah12,glm.krah11)												Df AIC BIC logLik deviance Chisq Chi Df Pr(>Chisq)													Data: krah0
															refitting model(s) with ML (instead of REML)												glm.krah12 6 28.549 42.209 -8.2743 16.549													Models:
															Data: krah0												glm.krah11 7 29.779 45.716 -7.8897 15.779 0.7692 1 0.3805													glm.krah12: reak ~ cest + lok + stad + (1 | ind)
															Models:												> glm.krah12<-lmer(reak~cest+lok+stad+(1|ind),data= krah0)													glm.krah11: reak ~ hust + cest + lok + stad + (1 | ind)
															glm.krah12: reak ~ cest + lok + stad + (1 | ind)												> anova(glm.krah12,glm.krah11)													Df AIC BIC logLik deviance Chisq Chi Df Pr(>Chisq)
															glm.krah11: reak ~ hust + cest + lok + stad + (1 | ind)												refitting model(s) with ML (instead of REML)													glm.krah12 6 88.325 101.98 -38.163 76.325
															Df AIC BIC logLik deviance Chisq Chi Df Pr(>Chisq)												Data: krah0													glm.krah11 7 90.003 105.94 -38.001 76.003 0.3224 1 0.5702
															glm.krah12 6 85.472 99.132 -36.736 73.472												Models:
															glm.krah11 7 84.167 100.104 -35.084 70.167 3.305 1 0.06907 .												glm.krah12: reak ~ cest + lok + stad + (1 | ind)
															---												glm.krah11: reak ~ hust + cest + lok + stad + (1 | ind)
																											Df AIC BIC logLik deviance Chisq Chi Df Pr(>Chisq)
																											glm.krah12 6 27.949 41.609 -7.9746 15.949
																											glm.krah11 7 29.779 45.716 -7.8897 15.779 0.1699 1 0.6802
																											>

## Sheet: correlation
habitat density	nest height	path distance	individuality
1	1.94591	4.09434	1
2	2.56495	4.31749	2			factor	Correlation (Tab1) Označ. korelace jsou významné na hlad. p < ,05000 N=36 (Celé případy vynechány u ChD)
2	2.63906	3.91202	3				Mean	St. Dev.	density	height	path
1	2.48491	2.70805	4			density	1.86111	0.723198	1	0.744076	-0.442908
1	2.07944	2.30259	5			nest height	2.31506	0.308303	0.744076	1	-0.334026
2	2.56495	4.78749	6			path deistance	3.36317	1.14918	-0.442908	-0.334026	1
2	2.70805	2.70805	7
2	2.48491	5.29832	8
2	2.48491	4.38203	9
3	2.63906	2.99573	10			nest height correlates with habitat density (dont use height)
2	2.30259	3.68888	11			path distance remains
1	2.07944	2.70805	12			r=074
1	1.94591	5.29832	13
1	1.79176	4.60517	14
2	2.3979	3.91202	15
3	2.48491	3.4012	16			significance:
2	2.30259	4.09434	17			0.0125
2	2.48491	2.70805	18
2	2.56495	2.89037	19
1	1.94591	4.60517	20
2	2.07944	3.68888	21
3	2.77259	1.79176	22
1	1.94591	4.60517	23
2	2.48491	3.68888	24
2	2.30259	0.693147	25
4	2.70805	0.693147	26
2	2.07944	4.00733	27
2	2.48491	3.55535	28
2	2.63906	3.91202	29
3	2.77259	1.38629	30
2	2.3979	2.70805	31
2	2.19722	1.79176	32
1	2.07944	2.70805	33
1	1.60944	3.80666	34
1	1.94591	3.21888	35
2	1.94591	3.4012	36

## Sheet: graphs
	stage	response																	response 4	response	locality	stage		n response	stage			%response 4	locality				response 1	response	stage		n response	stage
	1	0		stage/reasponse	1	2														0	1	1			1	2			rural	urban	total			0	1			1	2
	1	0		0	23	29														0	1	1		1	11	15		stay	15.3846	84.6154	100			0	1		1	13	7
	1	0		1	13	7														0	1	1		0	25	21		other - leave	65.2174	34.7826	100			0	1		0	23	29
	1	0																		0	1	1												0	1
	1	0																		0	1	1		1	36	0								0	1		%response 4	stage
	1	0																		0	1	1						%response 4	stage					0	1			eggs	pull	total
	1	0																		0	1	1							eggs	pull	total			0	1		1 leave	65	35	100
	1	0																		0	1	1						1 stay	42.3077	57.6923	100			0	1		0 other	44.2308	55.7692	100
	1	0																		0	1	1						0 other response - leave	54.3478	45.6522	100			0	1
	1	0																		0	1	1												0	1
	1	0																		0	1	1												0	1
	1	0																		0	1	1												0	1
	1	0																		0	1	1												0	1
	1	0																		0	1	1												0	1
	1	0																		0	1	1												0	1
	1	0								stage 0				stage 1						0	1	1												0	1
	1	0																		0	2	1												0	1
	1	0							Y: % reakcí											0	2	1												0	1
	1	0																		0	2	1												0	1
	1	0																		0	2	1												0	1
	1	0																		0	2	1												0	1
	1	0																		0	2	1												0	1
	1	0																		0	2	1												0	1
	1	1																		0	2	1												0	2
	1	1																		0	2	1												0	2
	1	1																		1	1	1												0	2
	1	1																		1	2	1												0	2
	1	1																		1	2	1												0	2
	1	1																		1	2	1												0	2
	1	1																		1	2	1												0	2
	1	1																		1	2	1												0	2
	1	1																		1	2	1												0	2
	1	1																		1	2	1												0	2
	1	1																		1	2	1												0	2
	1	1																		1	2	1												0	2
	1	1																		1	2	1												0	2
	2	0																		0	1	2												0	2
	2	0																		0	1	2												0	2
	2	0																		0	1	2												0	2
	2	0																		0	1	2												0	2
	2	0																		0	1	2												0	2
	2	0																		0	1	2												0	2
	2	0																		0	1	2												0	2
	2	0																		0	1	2												0	2
	2	0																		0	1	2												0	2
	2	0																		0	1	2												0	2
	2	0																		0	1	2												0	2
	2	0																		0	1	2												0	2
	2	0																		0	1	2												0	2
	2	0																		0	1	2												0	2
	2	0																		0	2	2												0	2
	2	0																		0	2	2												0	2
	2	0																		0	2	2												1	1
	2	0																		0	2	2												1	1
	2	0																		0	2	2												1	1
	2	0																		0	2	2												1	1
	2	0																		0	2	2												1	1
	2	0																		1	1	2												1	1
	2	0																		1	1	2												1	1
	2	0																		1	1	2												1	1
	2	0																		1	2	2												1	1
	2	0																		1	2	2												1	1
	2	0																		1	2	2												1	1
	2	0																		1	2	2												1	1
	2	0																		1	2	2												1	1
	2	1																		1	2	2												1	2
	2	1																		1	2	2												1	2
	2	1																		1	2	2												1	2
	2	1																		1	2	2												1	2
	2	1																		1	2	2												1	2
	2	1																		1	2	2												1	2
	2	1																		1	2	2												1	2

## Sheet: List2
1	7		Nest habitat/nest height
1	12
1	8		1	7.45455
1	7		2	11.3
1	6		3	14.2857
1	7		4	15
1	7
1	12
1	7
1	5
1	8
1	8
1	6
1	5
1	7
1	8
1	7
1	7
1	7
1	8
1	7
1	8
2	14
2	11
2	12
2	8
2	8
2	12
2	7
2	12
2	8
2	8
2	12
2	12
2	14
2	12
2	12
2	7
2	13
2	15
2	10
2	12
2	14
2	10
2	11
2	12
2	14
2	13
2	10
2	13
2	10
2	11
2	9
2	13
2	13
2	15
2	10
2	13
2	12
2	10
2	11
2	9
3	14
3	12
3	14
3	16
3	16
3	12
3	16
3	16
4	15
4	15
hust	vyshn
